# Supplementary material for: High dispersion of TiO2nanocrystals within porous carbon improves lithium storage capacity and can be applied batteries to LiNi0.5Mn1.5O4
Source: Royal Society of Chemistry journal article supplement (doi:10.1039/c4ta03557g), 2014-01-01
Supplement: c4ta03557g1.pdf [file c4ta03557g1.pdf]

## *Supporting information for*

### **Highly dispersion of TiO<sub>2</sub> nanocrystals within porous carbon towards tunable lithium storage ability and its battery application versus LiNi<sub>0.5</sub>Mn<sub>1.5</sub>O<sub>4</sub>**

Hai Ming,<sup>a,b</sup> Jun Ming,<sup>\*b</sup> Seung-Min Oh,<sup>b</sup> Eung-Ju Lee,<sup>b</sup> Hui Huang,<sup>c</sup> Qun Zhou,<sup>a</sup>  
Junwei Zheng,<sup>\*a</sup> and Yang-Kook Sun<sup>\*b</sup>

<sup>a</sup> College of Chemistry, Chemical Engineering and Materials Science, Soochow University,  
Suzhou 215123, P. R. China. E-mail: jwzheng@suda.edu.cn;

<sup>b</sup> Department of Energy Engineering, Hanyang University, Seoul, 133-791, Republic of Korea; E-mail: yksun@hanyang.ac.kr; mingjun6297@gmail.com;

<sup>c</sup> Institute of Functional Nano & Soft Materials (FUNSOM) and Jiangsu Key, Laboratory for Carbon Based Functional Materials & Devices, Soochow University, Suzhou, Jiangsu 215123, P. R. China.

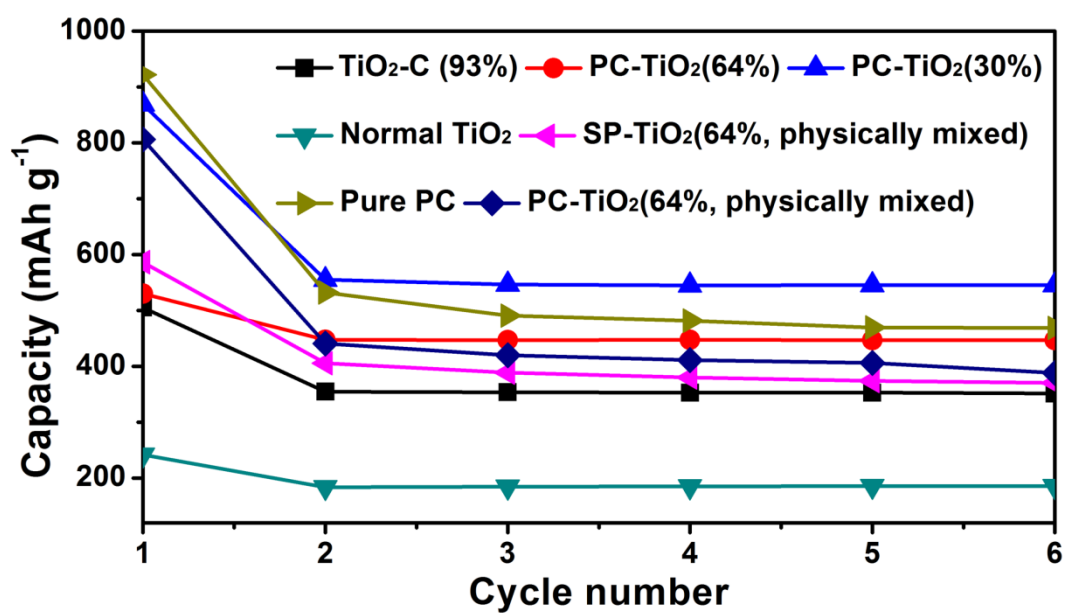

**Fig. S1** Comparative performances of  $\text{TiO}_2\text{-C(93\%)}$ ,  $\text{PC-TiO}_2(64\%)$ ,  $\text{PC-TiO}_2(30\%)$ , normal  $\text{TiO}_2$  nanoparticles,  $\text{PC-TiO}_2(64\%, \text{physically mixed})$  and  $\text{SP-TiO}_2 (64\%, \text{physically mixed})$  electrodes under the current density of  $50 \text{ mA g}^{-1}$ .
